# Supplementary material for: Transcriptomic profiles and 5-year results from the randomized CLL14 study of venetoclax plus obinutuzumab versus chlorambucil plus obinutuzumab in chronic lymphocytic leukemia
Source: PubMed Central journal article supplement (PMC10113251; doi:10.1038/s41467-023-37648-w), 2023-04-18
Supplement: 41467_2023_37648_MOESM3_ESM.pdf [file 41467_2023_37648_MOESM3_ESM.pdf]

## **Description of Additional Supplementary Files**

**Supplementary Data 1:** Differentially expressed genes between patients with MRD+ and MRD6. Based on 404 pre-treatment samples, filtered for  $\log_{2}FC > 0.5$ ,  $pval < 0.01$ .

**Supplementary Data 2:** Differentially expressed genes between relapse and baseline. Based on 45 relapse and paired pre-treatment samples, filtered for  $\log_{2}FC > 2$  and  $adjPVal < 0.05$ .
